# Supplementary material for: Guild Vertical Stratification and Drivers of Bat Foraging in a Semi-Arid Tropical Region, Kenya
Source: MDPI journal article supplement (doi:10.3390/biology12081116), 2023-08-10
Supplement: s1 [file s1]

## Guild vertical stratification and drivers of bat foraging activity in a semi-arid tropical region, Kenya.

### Supplementary materials

Table S1. Summary of the data recorded from bats captured in mistnets (Nets) or roosts (Roost). The gender of each bat is defined as female (F) or male (M), its age as young (Y) or adult (A), and reproductive status as having small (S), medium (M), or large (B) testes (T) or nipples (N). The presence of false nipples (FN) and eventual pregnancies (Preg) are also listed. The length of the forearm, noseleaf (Nleaf), tragus, ear, and tail are indicated in millimeters, while the weight is in grams. We measured and averaged the average frequency of maximum power (FMaxE, kHz), minimum frequency (FMin, kHz), duration (Dur, ms), and interval (Int, ms) from five pulses of echolocation calls recorded when bats were released. The shape of the pulses was classified as modulated (FM), constant (CF), or quasi-constant (QCF) frequencies.

| Species                | Method | Date       | YY     | XX     | Gender | Age / Cycle        | Forearm | Weight | Nleaf | Tragus | Ear  | Tail | Recording | FMaxE | FMin  | Dur  | Int   | Shape |
|------------------------|--------|------------|--------|--------|--------|--------------------|---------|--------|-------|--------|------|------|-----------|-------|-------|------|-------|-------|
| <i>Cardioderma cor</i> | Nets   | 30/11/2016 | 0.2773 | 37.722 | F      | A / SN             | 54.8    | 24.5   | 11.4  | 16.4   | 37.7 |      |           |       |       |      |       |       |
| <i>Cardioderma cor</i> | Nets   | 30/11/2016 | 0.2773 | 37.722 | F      | A / SN             | 54.3    | 29.5   | 11.7  | 16.9   | 35.4 |      | _204117 A | 45.16 | 40.08 | 1.1  | 53    | FM    |
| <i>Lavia frons</i>     | Nets   | 30/11/2016 | 0.2773 | 37.722 | M      | A / ST             | 56.6    | 20.5   | 22.8  | 24.6   | 40   |      | _205847 A |       |       |      |       |       |
| <i>Cardioderma cor</i> | Nets   | 30/11/2016 | 0.2773 | 37.722 | M      | A / ST             | 52.4    | 27.5   | 12.6  | 13.7   | 31.8 |      | _210759 A | 43.98 | 36.06 | 1.48 | 142.6 | FM    |
| <i>Cardioderma cor</i> | Nets   | 30/11/2016 | 0.2773 | 37.722 | M      | A / ST             | 57.1    | 29.5   | 13.4  | 17.6   | 36.8 |      | _211613 A | 49.42 | 39.4  | 2.94 | 60.6  | FM    |
| <i>Cardioderma cor</i> | Nets   | 30/11/2016 | 0.2773 | 37.722 | F      | A / Preg           | 58.9    | 34.5   | 13.1  | 19.4   | 34.4 |      | _212147 A | 49.2  | 38.46 | 1.18 | 30.6  | FM    |
| <i>Cardioderma cor</i> | Nets   | 30/11/2016 | 0.2773 | 37.722 | M      | A / MT             | 53.6    | 30     | 13    | 15.7   | 34.7 |      | _212614 A |       |       |      |       |       |
| <i>Cardioderma cor</i> | Nets   | 30/11/2016 | 0.2773 | 37.722 | F      | A / FN / MN        | 56      | 35.5   | 12.2  | 14.9   | 37.2 |      | _212942 A | 46.48 | 38.88 | 1.54 | 23.42 | FM    |
| <i>Cardioderma cor</i> | Nets   | 30/11/2016 | 0.2773 | 37.722 | M      | A / MT             | 55.1    | 29     | 13.1  | 16.2   | 33.4 |      | _213437 A |       |       |      |       |       |
| <i>Cardioderma cor</i> | Nets   | 30/11/2016 | 0.2773 | 37.722 | F      | A / FN / MN / Preg | 54.8    | 32     | 13.1  | 14.1   | 37.4 |      | _213936 A | 48.3  | 38.8  | 0.41 | 24.17 | FM    |
| <i>Cardioderma cor</i> | Nets   | 30/11/2016 | 0.2773 | 37.722 | M      | A / MT             | 55.3    | 26     | 12.8  | 16.4   | 37.2 |      | _214505 A |       |       |      |       |       |
| <i>Cardioderma cor</i> | Nets   | 30/11/2016 | 0.2773 | 37.722 | M      | A / ST             | 56.4    | 29.5   | 13.2  | 17.2   | 37.5 |      | _214912 A | 47.1  | 37.58 | 2.22 | 67.46 | FM    |
| <i>Cardioderma cor</i> | Nets   | 30/11/2016 | 0.2773 | 37.722 | F      | A / SN             | 57.1    | 29     | 12.4  | 15.8   | 36.2 |      | _215221 A | 49.38 | 40.18 | 2    | 71.04 | FM    |
| <i>Cardioderma cor</i> | Nets   | 30/11/2016 | 0.2773 | 37.722 | F      | A / SN             | 54.4    | 24     | 12.5  | 14.5   | 33.4 |      | _215716 A | 49.58 | 40.06 | 2.86 | 61.46 | FM    |
| <i>Lavia frons</i>     | Nets   | 02/12/2016 | 0.3141 | 37.726 | M      | A / ST             | 57.25   | 23.5   | 20.7  | 25.4   | 38   |      | _201727 A | 34.22 | 28.5  | 0.93 | 28    | FM    |
| <i>Lavia frons</i>     | Nets   | 02/12/2016 | 0.3141 | 37.726 | F      | A / SN             | 59.6    | 26     | 21.6  | 24.7   | 42.6 |      | _203312 A |       |       |      |       |       |

| Species                          | Method | Date       | YY     | XX     | Gender | Age / Cycle  | Forearm | Weight | Nleaf | Tragus | Ear  | Tail | Recording | FMaxE | FMin  | Dur  | Int   | Shape |
|----------------------------------|--------|------------|--------|--------|--------|--------------|---------|--------|-------|--------|------|------|-----------|-------|-------|------|-------|-------|
| <i>Cardioderma cor</i>           | Nets   | 04/12/2016 | 0.3500 | 37.676 | F      | A / SN       | 57.5    | 27.5   | 13.6  | 13.6   | 41.1 |      | _193201 A | 49.56 | 43.62 | 1.67 | 26.94 | FM    |
| <i>Cardioderma cor</i>           | Nets   | 04/12/2016 | 0.3500 | 37.676 | F      | A / SN       | 54.6    | 27.5   | 15.1  | 15.1   | 33.9 |      |           |       |       |      |       |       |
| <i>Cardioderma cor</i>           | Nets   | 04/12/2016 | 0.3493 | 37.676 | F      | A / SN       | 57      | 31.5   | 15.2  | 15.2   | 28.6 |      |           |       |       |      |       |       |
| <i>Nycticeius schlieffeni</i>    | Nets   | 04/12/2016 | 0.3500 | 37.675 | M      | A / MT       | 32.9    | 8      |       |        | 8.3  | 40.2 | _201044 A |       |       |      |       |       |
| <i>Lavia frons</i>               | Nets   | 04/12/2016 | 0.3493 | 37.676 | M      | A / ST       | 58.6    | 33.2   | 20.5  | 22.1   | 38.1 |      | _201623 A | 37.14 | 28.66 | 1.71 | 40.75 | FM    |
| <i>Lavia frons</i>               | Nets   | 04/12/2016 | 0.3493 | 37.676 | F      | A / FN / SN  | 62      | 30.05  | 23.9  | 27.7   | 42.5 |      |           |       |       |      |       |       |
| <i>Cardioderma cor</i>           | Nets   | 04/12/2016 | 0.3493 | 37.676 | M      | A / ST       | 52.6    | 28.5   | 10.8  | 12.4   | 29.8 |      | _203704 A | 47.28 | 42.82 | 0.6  | 25.97 | FM    |
| <i>Lavia frons</i>               | Nets   | 04/12/2016 | 0.3500 | 37.675 | F      | A / SN       | 62.6    | 29     | 23.9  | 28.1   | 43.3 |      | _215751 A | 31.5  | 27.76 | 0.8  | 56.92 | FM    |
| <i>Lavia frons</i>               | Nets   | 05/12/2016 | 0.3356 | 37.746 | F      | A / FN / BN  | 61      | 31.5   | 23.3  | 29.9   | 45.4 |      | _195431 A | 37.28 | 27.24 | 2.92 | 121.9 | FM    |
| <i>Cardioderma cor</i>           | Nets   | 05/12/2016 | 0.3363 | 37.746 | F      | A / BN       | 57.4    | 31.5   | 13.6  | 33.8   | 13.7 |      | _211748 A | 43.86 | 38.08 | 1.44 | 235.7 | FM    |
| <i>Lavia frons</i>               | Nets   | 07/12/2016 | 0.2941 | 37.679 | F      | A / SN       | 62.5    | 25.5   | 22.8  | 24.2   | 40.7 |      |           |       |       |      |       |       |
| <i>Lavia frons</i>               | Nets   | 07/12/2016 | 0.2949 | 37.679 | F      | A / FN / BBN | 61.3    | 25     | 25    | 26     | 40   |      |           |       |       |      |       |       |
| <i>Lavia frons</i>               | Nets   | 07/12/2016 | 0.2941 | 37.679 | M      | A / ST       | 59.4    | 21     | 20.7  | 23.3   | 40   |      |           |       |       |      |       |       |
| <i>Scotoecus sp.</i>             | Nets   | 07/12/2016 | 0.2949 | 37.679 | F      | Y            | 29.2    | 5      |       |        |      | 24.1 |           |       |       |      |       |       |
| <i>Scotophilus andrewreborii</i> | Roost  | 08/12/2016 | 0.2617 | 37.75  | F      | Y            | 41      | 28.5   |       |        |      |      |           |       |       |      |       |       |
| <i>Lavia frons</i>               | Nets   | 08/12/2016 | 0.3226 | 37.636 | F      | A / FN / BN  | 62.8    |        | 24.9  | 27.8   | 45.7 |      |           |       |       |      |       |       |
| <i>Lavia frons</i>               | Nets   | 08/12/2016 | 0.3226 | 37.636 |        |              |         |        |       |        |      |      |           |       |       |      |       |       |
| <i>Lavia frons</i>               | Nets   | 08/12/2016 | 0.3226 | 37.636 |        |              |         |        |       |        |      |      |           |       |       |      |       |       |
| <i>Lavia frons</i>               | Nets   | 08/12/2016 | 0.3227 | 37.636 | F      | A / FN / BN  | 62.5    | 30     | 23.2  | 26.5   | 43.8 |      |           |       |       |      |       |       |
| <i>Scotophilus andrewreborii</i> | Nets   | 08/12/2016 | 0.3235 | 37.636 | M      | A / ST       | 51.8    | 23.5   |       |        |      | 52.5 |           |       |       |      |       |       |
| <i>Lavia frons</i>               | Nets   | 09/12/2016 | 0.3350 | 37.693 | M      | A / ST       | 56.1    | 18.5   | 21.9  | 25.5   | 39.5 |      |           |       |       |      |       |       |
| <i>Lavia frons</i>               | Nets   | 09/12/2016 | 0.3357 | 37.692 | M      | A / MT       | 56.9    | 20     | 21.4  | 25.4   | 41.9 |      | _195250 A | 35.18 | 31.38 | 0.76 | 22.55 | FM    |
| <i>Lavia frons</i>               | Nets   | 09/12/2016 | 0.3357 | 37.692 | F      | A / FN / BBN | 60.8    | 28     | 22.1  | 25.3   | 40.3 |      | _195713 A | 35.06 | 28.76 | 1.58 | 52.67 | FM    |
| <i>Cardioderma cor</i>           | Nets   | 09/12/2016 | 0.3355 | 37.692 | M      | A / ST       | 55.6    | 29     | 14    | 17.6   | 41.5 |      | _203426 A | 41.98 | 37.94 | 0.71 | 21.56 | FM    |
| <i>Cardioderma cor</i>           | Nets   | 09/12/2016 | 0.3355 | 37.692 | M      | A / BT       | 56.6    | 27.5   | 15.3  | 19.7   | 40.1 |      | _204007 A | 42.7  | 37.82 | 0.96 | 25.25 | FM    |
| <i>Cardioderma cor</i>           | Nets   | 09/12/2016 | 0.3342 | 37.693 | M      | A / MT       | 54.8    | 27     | 14.6  | 18.4   | 38.4 |      |           |       |       |      |       |       |

[illegible]

| Species                          | Method | Date       | YY     | XX     | Gender | Age / Cycle    | Forearm | Weight | Nleaf | Tragus | Ear  | Tail | Recording | FMaxE | FMin  | Dur  | Int   | Shape |
|----------------------------------|--------|------------|--------|--------|--------|----------------|---------|--------|-------|--------|------|------|-----------|-------|-------|------|-------|-------|
| <i>Epomophorus minimus</i>       | Nets   | 21/05/2017 | 0.3019 | 37.736 | M      | A / BT         | 58.8    | 36.5   |       |        | 14   |      |           |       |       |      |       |       |
| <i>Epomophorus minimus</i>       | Nets   | 21/05/2017 | 0.3019 | 37.736 | M      | A / BT         | 58      | 40.5   |       |        | 16.3 |      |           |       |       |      |       |       |
| <i>Epomophorus minimus</i>       | Nets   | 21/05/2017 | 0.3019 | 37.736 | M      | J / ST         | 56.4    | 31     |       |        | 15   |      |           |       |       |      |       |       |
| <i>Epomophorus minimus</i>       | Nets   | 21/05/2017 | 0.3019 | 37.736 | F      | A / SN         | 59.1    | 39     |       |        | 17.1 |      |           |       |       |      |       |       |
| <i>Scotophilus andrewreborii</i> | Nets   | 21/05/2017 | 0.3019 | 37.736 | F      | A / SN / Preg? | 24.4    |        |       |        |      |      | _213621 D | 33.66 | 30.8  | 3.42 | 88.4  | FM(i) |
| <i>Epomophorus minimus</i>       | Nets   | 22/05/2017 | 0.3224 | 37.715 | M      | ST             | 56.7    | 41.5   |       |        | 16.6 |      |           |       |       |      |       |       |
| <i>Cardioderma cor</i>           | Nets   | 22/05/2017 | 0.3224 | 37.715 |        |                |         |        |       |        |      |      |           |       |       |      |       |       |
| <i>Scotophilus andrewreborii</i> | Roost  | 12/05/2017 | 0.3048 | 37.666 |        |                |         |        |       |        |      |      |           |       |       |      |       |       |
| <i>Molossidae</i>                | Roost  | 12/05/2017 | 0.3048 | 37.666 |        |                |         |        |       |        |      |      |           |       |       |      |       |       |
| <i>Neoromicia somalica</i>       | Nets   | 26/09/2017 | 0.3500 | 37.676 | F      | A / SN         | 32.5    | 10     |       |        | 9.7  | 32.6 | _193456 A | 44.2  | 35    | 2.1  | 27.2  | FM/CF |
| <i>Lavia frons</i>               | Nets   | 26/09/2017 | 0.3493 | 37.676 | M      | A / ST         | 57.3    | 18.5   | 28.4  | 34.6   | 45.3 |      | _195251 A | 37.32 | 26.91 | 2.5  | 112.9 | FM    |
| <i>Cardioderma cor</i>           | Nets   | 26/09/2017 | 0.3500 | 37.676 | M      | A / ST?        | 56.8    | 28.5   | 15.5  | 18.1   | 35.8 |      | _211604 A | 43.1  | 39.1  | 1.03 | 52.4  | FM    |
| <i>Cardioderma cor</i>           | Nets   | 27/09/2017 | 0.3354 | 37.692 | M      | A / ST         | 53.4    | 26     | 13    | 16.8   | 37.2 |      | _203142 A | 44.2  | 38.3  | 1.9  | 49.2  | FM    |
| <i>Lavia frons</i>               | Nets   | 28/09/2017 | 0.3362 | 37.746 | F      | A / FN / BN    | 60.5    | 22.5   | 21.4  | 26.9   | 40.9 |      | _190603 A |       |       |      |       |       |
| <i>Lavia frons</i>               | Nets   | 29/09/2017 | 0.3396 | 37.701 | M      | A / ST         | 60.4    | 21.5   | 21.9  | 25.1   | 41.6 |      | _193554 D | 37    | 29.2  | 2    | 138   | FM    |
| <i>Cardioderma cor</i>           | Nets   | 29/09/2017 | 0.3414 | 37.699 | M      | A / MT         | 56.5    | 28.5   | 14.8  | 14.2   | 33.6 |      | _200246 D | 51.3  | 42    | 2.3  | 62.3  | FM    |
| <i>Lavia frons</i>               | Nets   | 29/09/2017 | 0.3415 | 37.699 | F      | A / FN / BN    | 60.9    | 23.5   | 22.3  | 25.4   | 41.7 |      | _200401 D | 33.6  | 28    | 1.05 | 117   | FM    |
| <i>Cardioderma cor</i>           | Nets   | 29/09/2017 | 0.3415 | 37.699 | M      | Y / ST         | 56.7    | 28     | 13.7  | 15.5   | 34.6 |      |           |       |       |      |       |       |
| <i>Epomophorus minimus</i>       | Nets   | 30/09/2017 | 0.3223 | 37.716 | M      | Y / ST         | 58      | 41     |       |        | 19.4 |      |           |       |       |      |       |       |
| <i>Epomophorus minimus</i>       | Nets   | 30/09/2017 | 0.3223 | 37.716 | M      | A / ST         | 57.1    | 38     |       |        | 15.7 |      |           |       |       |      |       |       |
| <i>Epomophorus minimus</i>       | Nets   | 30/09/2017 | 0.3223 | 37.716 | F      | F              | 60.8    | 41.5   |       |        | 19.2 |      |           |       |       |      |       |       |
| <i>Epomophorus minimus</i>       | Nets   | 30/09/2017 | 0.3222 | 37.714 | M      | A / ST         | 58.3    | 39.5   |       |        | 19.7 |      |           |       |       |      |       |       |
| <i>Epomophorus minimus</i>       | Nets   | 30/09/2017 | 0.3209 | 37.716 | M      | A / ST         | 58.9    | 41     |       |        | 17.8 |      |           |       |       |      |       |       |
| <i>Epomophorus minimus</i>       | Nets   | 30/09/2017 | 0.3209 | 37.716 | M      | A / ST         | 56.6    | 43     |       |        | 15.5 |      |           |       |       |      |       |       |
| <i>Epomophorus minimus</i>       | Nets   | 01/10/2017 | 0.3143 | 37.727 | M      | A / BT         | 56.3    | 39.5   |       |        | 15.9 |      |           |       |       |      |       |       |
| <i>Epomophorus minimus</i>       | Nets   | 01/10/2017 | 0.3143 | 37.727 | M      | A / BT         | 59.5    | 42     |       |        | 17.5 |      |           |       |       |      |       |       |

| Species                       | Method | Date       | YY     | XX     | Gender | Age / Cycle   | Forearm | Weight | Nleaf | Tragus | Ear  | Tail | Recording | FMaxE | FMin | Dur  | Int   | Shape |
|-------------------------------|--------|------------|--------|--------|--------|---------------|---------|--------|-------|--------|------|------|-----------|-------|------|------|-------|-------|
| <i>Epomophorus minimus</i>    | Nets   | 01/10/2017 | 0.3143 | 37.727 | M      | A / BT        | 55.7    |        |       |        | 12.8 |      |           |       |      |      |       |       |
| <i>Epomophorus minimus</i>    | Nets   | 01/10/2017 | 0.3143 | 37.727 | M      | A / BT        | 56.9    | 35.5   |       |        | 15.4 |      |           |       |      |      |       |       |
| <i>Epomophorus minimus</i>    | Nets   | 01/10/2017 | 0.3143 | 37.727 | M      | A / BT        | 57.6    | 40     |       |        | 17.2 |      |           |       |      |      |       |       |
| <i>Epomophorus minimus</i>    | Nets   | 01/10/2017 | 0.3143 | 37.727 | M      | A / BT        | 56.2    | 37     |       |        | 15.2 |      |           |       |      |      |       |       |
| <i>Epomophorus minimus</i>    | Nets   | 01/10/2017 | 0.3143 | 37.727 | M      | A / MT        | 57.6    | 31.5   |       |        | 16.9 |      |           |       |      |      |       |       |
| <i>Epomophorus minimus</i>    | Nets   | 01/10/2017 | 0.3143 | 37.727 | M      | A / MT        | 57.9    | 38.5   |       |        | 16.9 |      |           |       |      |      |       |       |
| <i>Nycticeius schlieffeni</i> | Nets   | 01/10/2017 | 0.3143 | 37.727 | M      | A / BT        | 33      | 5.5    |       |        | 8    | 33.5 | _200203 D | 41.3  | 36   | 3.7  | 86.3  | FM/CF |
| <i>Nycticeius schlieffeni</i> | Nets   | 01/10/2017 | 0.3143 | 37.727 | M      | A / ST        | 34      | 7      |       |        | 9.3  | 37.3 | _203537 D | 40.1  | 35.3 | 3.09 | 84.1  | FM/CF |
| <i>Hipposideros caffer</i>    | Nets   | 01/10/2017 | 0.3143 | 37.727 | F      | Y / SN        | 46.9    |        |       |        | 11.4 | 27.4 | _200803 D | 154.1 | 118  | 6.9  | 16.3  | CF/FM |
| <i>Laephotis kirinyaga</i>    | Nets   | 01/10/2017 | 0.3143 | 37.727 | M      | A / MT        | 28.2    | 4      |       |        | 7.1  | 23   | _204639 D | 40.7  | 38   | 3.4  | 88.4  | FM/CF |
| <i>Mops pumilla</i>           | Nets   | 01/10/2017 | 0.3144 | 37.726 | M      | Y / ST        | 20      | 9      |       |        | 5.4  | 16.8 | _212651 D | 22.5  | 19.2 | 6.4  | 129.5 | QCF   |
| <i>Mops pumilla</i>           | Nets   | 01/10/2017 | 0.3144 | 37.726 | M      | A / ST        | 37      | 10     |       |        | 10.2 | 26.8 | _214207 A | 24.8  | 20.2 | 6.3  | 171.5 | QCF   |
| <i>Mops pumilla</i>           | Nets   | 01/10/2017 | 0.3144 | 37.726 | M      | A / MT        | 40      | 12     |       |        | 13.1 | 30.1 | _214756 A | 23.1  | 19.1 | 5.4  | 56.7  | QCF   |
| <i>Mops pumilla</i>           | Nets   | 01/10/2017 | 0.3144 | 37.726 | F      | Y / SN        | 35.3    |        |       |        | 9.1  | 24.9 | _223702 A | 21.9  | 19.3 | 10.2 | 444.0 | QCF   |
| <i>Mops pumilla</i>           | Nets   | 01/10/2017 | 0.3144 | 37.726 | M      | A / BT        | 37.9    | 10.5   |       |        | 11   | 30.1 |           |       |      |      |       |       |
| <i>Scotoecus sp.</i>          | Nets   | 01/10/2017 | 0.3144 | 37.726 | F      | A / BN / Preg | 34.6    | 13     |       |        | 8.9  |      | _224500 A | 37.8  | 34   | 4.8  | 72.9  | FM/CF |
| <i>Mops condylurus</i>        | Nets   | 01/10/2017 | 0.3143 | 37.727 | M      | A / MT        | 44.6    | 16.5   |       |        | 12.5 | 37.2 | _224705 A | 24.5  | 19.3 | 5.7  | 92.3  | QCF   |
| <i>Cardioderma cor</i>        | Nets   | 02/10/2017 | 0.2819 | 37.722 | F      | A / BN        | 56.7    | 29     | 13.9  | 20     | 33.9 |      |           |       |      |      |       |       |
| <i>Cardioderma cor</i>        | Nets   | 02/10/2017 | 0.2819 | 37.722 | F      | A / BN        | 58.5    | 28     | 12.6  | 19.2   | 39.8 |      |           |       |      |      |       |       |
| <i>Lavia frons</i>            | Nets   | 02/10/2017 | 0.2819 | 37.722 | M      | A / ST        | 59.2    | 20     | 20.8  | 28.1   | 44.9 |      |           |       |      |      |       |       |
| <i>Cardioderma cor</i>        | Nets   | 02/10/2017 | 0.2815 | 37.722 | M      | A / ST        | 52      |        | 12.6  | 15.9   | 35   |      |           |       |      |      |       |       |
| <i>Cardioderma cor</i>        | Nets   | 02/10/2017 | 0.2815 | 37.722 | F      | A / SN        | 56.1    | 28     | 14.7  | 18.6   | 36.3 |      |           |       |      |      |       |       |
| <i>Cardioderma cor</i>        | Nets   | 02/10/2017 | 0.2815 | 37.722 | F      | A / BN        | 59.2    | 29.5   | 16    | 20.8   | 35.1 |      |           |       |      |      |       |       |
| <i>Cardioderma cor</i>        | Nets   | 02/10/2017 | 0.2815 | 37.722 | F      | A / FN / BN   | 54.6    | 27.5   | 14.8  | 16.3   | 30.2 |      |           |       |      |      |       |       |
| <i>Cardioderma cor</i>        | Nets   | 02/10/2017 | 0.2815 | 37.722 | F      | A / BN        | 56.4    | 28     | 16.3  | 21.1   | 33.4 |      |           |       |      |      |       |       |
| <i>Cardioderma cor</i>        | Nets   | 02/10/2017 | 0.2815 | 37.722 | F      | A / FN / BN   | 58.9    | 28.5   | 14.5  | 22.2   | 32.3 |      |           |       |      |      |       |       |

| <i>Species</i>         | Method | Date       | YY     | XX     | Gender | Age / Cycle | Forearm | Weight | Nleaf | Tragus | Ear  | Tail | Recording | FMaxE | FMin | Dur | Int | Shape |
|------------------------|--------|------------|--------|--------|--------|-------------|---------|--------|-------|--------|------|------|-----------|-------|------|-----|-----|-------|
| <i>Cardioderma cor</i> | Nets   | 02/10/2017 | 0.2815 | 37.722 | F      | A / BN      | 57      | 27     | 14.7  | 20.6   | 35.2 |      |           |       |      |     |     |       |
| <i>Cardioderma cor</i> | Nets   | 02/10/2017 | 0.2815 | 37.722 | F      | A / FN / BN | 57.6    |        | 15.1  | 22.1   | 37   |      |           |       |      |     |     |       |
| <i>Cardioderma cor</i> | Nets   | 02/10/2017 | 0.2815 | 37.722 | F      | A / FN / BN | 56.8    | 28.5   | 14.2  | 17.1   | 32   |      |           |       |      |     |     |       |

Table S2. Spearman correlation matrices displaying the correlation values between continuous independent variables. The top table summarizes the variables considered when modeling bat guild occurrence at ground level, while the bottom table pertains to the environmental variables used when modeling bat activity at height. For detailed information on each variable, please refer to Table 2 in the main document. It is worth noting that the correlation values, except for one, are all below 0.7, indicating the absence of strong correlations among variables. The only exception is the correlation between Relative and Absolute humidity (highlighted in bold) among the variables measured at height. As a result, these two variables were never included together in the same model.

| <i><b>Ground variables</b></i> | <i>RH</i> | <i>T</i> | <i>DEM</i> | <i>Dist_water</i> | <i>NDVI_Apr</i> | <i>Moon</i> |
|--------------------------------|-----------|----------|------------|-------------------|-----------------|-------------|
| Relative Humidity (RH)         | 1         |          |            |                   |                 |             |
| Temperature (T)                | -0.4235   | 1        |            |                   |                 |             |
| DEM                            | -0.11092  | 0.023305 | 1          |                   |                 |             |
| Dist to watercourses           | 0.00991   | -0.01342 | 0.044561   | 1                 |                 |             |
| NDVI_April                     | -0.07732  | 0.090435 | -0.21555   | -0.304713         | 1               |             |
| Illuminated moon               | -0.30516  | 0.214421 | -0.21384   | 0.00019854        | 0.1473429       | 1           |

  

| <i><b>Height variables</b></i> | <i>T</i> | <i>RH</i>      | <i>AH</i> | <i>Moon</i> | <i>Wind</i> |
|--------------------------------|----------|----------------|-----------|-------------|-------------|
| Temperature (T)                | 1        |                |           |             |             |
| Relative Humidity (RH)         | -0.33007 | 1              |           |             |             |
| Absolute Humidity (AH)         | -0.04556 | <b>0.89391</b> | 1         |             |             |
| Illuminated moon               | 0.04281  | -0.31806       | -0.39416  | 1           |             |
| Wind speed                     | -0.40951 | -0.03054       | -0.13291  | 0.15832804  | 1           |

Table S3. Binomial generalized linear models of bat-guild occurrence at the study area using ground-sampling data. Guild 6 was excluded due to the low number of observations. Variable names and descriptions are indicated in Table 1, guild descriptions and acronyms in Table 2. Significant results (p-value < 0.05) are highlighted in bold.

|                    | <i>High-flying Guild 1</i> |        |                  | <i>High-flying Guild 2</i> |       |                  | <i>Medium-flying Guild 3</i> |       |                  | <i>Medium-flying Guild 4</i> |       |              | <i>Low-flying Guild 5</i> |       |        |
|--------------------|----------------------------|--------|------------------|----------------------------|-------|------------------|------------------------------|-------|------------------|------------------------------|-------|--------------|---------------------------|-------|--------|
| Fixed              | $\beta$                    | SE     | p                | $\beta$                    | SE    | p                | $\beta$                      | SE    | p                | $\beta$                      | SE    | p            | $\beta$                   | SE    | p      |
| Intercept          | -8.031                     | 1.583  | <0.001           | -0.727                     | 0.357 | 0.041            | -3.285                       | 0.390 | <0.001           | -1.286                       | 0.841 | 0.126        | -6.926                    | 1.420 | <0.001 |
| Wind Class         | -0.336                     | 0.122  | <b>0.006</b>     | -0.578                     | 0.088 | <b>&lt;0.001</b> | -0.188                       | 0.079 | <b>0.017</b>     | -0.221                       | 0.112 | <b>0.048</b> |                           |       |        |
| Moon               |                            |        |                  | -1.815                     | 0.394 | <b>&lt;0.001</b> |                              |       |                  |                              |       |              |                           |       |        |
| RH                 | 0.407                      | 0.0.93 | <b>&lt;0.001</b> |                            |       |                  |                              |       |                  |                              |       |              |                           |       |        |
| Landcover - Fallow |                            |        |                  | 1.533                      | 0.523 | <b>0.003</b>     | 2.173                        | 0.533 | <b>&lt;0.001</b> |                              |       |              |                           |       |        |
| Farmed             |                            |        |                  | 3.931                      | 1.118 | <b>&lt;0.001</b> | 1.584                        | 0.612 | <b>0.010</b>     |                              |       |              |                           |       |        |
| Mosaic             |                            |        |                  | 1.278                      | 0.526 | <b>0.015</b>     | 2.153                        | 0.543 | <b>&lt;0.001</b> |                              |       |              |                           |       |        |
| Scrub              |                            |        |                  | 1.549                      | 0.505 | <b>0.002</b>     | 2.205                        | 0.537 | <b>&lt;0.001</b> |                              |       |              |                           |       |        |
| Village            |                            |        |                  | 1.359                      | 1.035 | 0.189            | 3.194                        | 0.974 | <b>0.001</b>     |                              |       |              |                           |       |        |
| Waterline          |                            |        |                  | 1.379                      | 0.474 | <b>0.003</b>     | 2.122                        | 0.511 | <b>&lt;0.001</b> |                              |       |              |                           |       |        |
| Wood sparse        |                            |        |                  | 1.117                      | 0.469 | <b>0.017</b>     | 0.975                        | 0.507 | 0.055            |                              |       |              |                           |       |        |
| NDVI               |                            |        |                  |                            |       |                  |                              |       |                  | 4.061                        | 2.090 | 0.050        | 11.306                    | 3.675 | 0.002  |



Table S4. Negative binomial generalized linear mixed models resuming the effect of environment variables and height on the activity of high-flying guilds as recorded at four automatic stations. The activity at 20 m was taken as a reference for the categorical variable height. Significant results (p-value < 0.05) are highlighted in bold.

|              | <i>High-flying Guild 1</i> |       |                  | <i>High-flying Guild 2</i> |       |                  | <i>Medium-flying Guild 3</i> |       |                  |
|--------------|----------------------------|-------|------------------|----------------------------|-------|------------------|------------------------------|-------|------------------|
| Fixed        | $\beta$                    | SE    | p                | $\beta$                    | SE    | p                | $\beta$                      | SE    | p                |
| Intercept    | -2.806                     | 0.489 | <0.001           | -1.133                     | 0.671 | 0.091            | -3.466                       | 0.510 | <0.001           |
| Height - 35m | -0.361                     | 0.096 | <b>&lt;0.001</b> | -0.272                     | 0.037 | <b>&lt;0.001</b> | -1.367                       | 0.085 | <b>&lt;0.001</b> |
| Ab. Humidity | 0.156                      | 0.026 | <b>&lt;0.001</b> | 0.171                      | 0.010 | <b>&lt;0.001</b> | 0.309                        | 0.024 | <b>&lt;0.001</b> |
| Temperature  |                            |       |                  | 0.068                      | 0.023 | <b>0.003</b>     |                              |       |                  |
| Wind Speed   | -0.325                     | 0.132 | <b>0.013</b>     | -0.364                     | 0.064 | <b>&lt;0.001</b> | -0.630                       | 0.104 | <b>&lt;0.001</b> |
| Random       | Var                        | SE    | Groups           | Var                        | SE    | Groups           | Var                          | SE    | Groups           |
| Season       | 0.286                      | 0.535 | 4                | 0.205                      | 0.453 | 4                | 0.465                        | 0.682 | 4                |
| Site         | 0.003                      | 0.054 | 2                | 0.041                      | 0.202 | 2                | 0.038                        | 0.194 | 2                |
